# Supplementary material for: Mechanisms of Antioxidant Resistance in Different Wheat Genotypes under Salt Stress and Hypoxia
Source: MDPI journal article supplement (doi:10.3390/ijms242316878), 2023-11-28
Supplement: s1 [file s1]

Table S1. Primer Information

| Gene            |                | 5'-3'-sequence                                                  | length of product |
|-----------------|----------------|-----------------------------------------------------------------|-------------------|
| <i>MnSOD</i>    | XM_044478966.1 | tga gtt tcc cgc tgt tgg at<br>aca ggc act gtt cta tgc gt        | 122               |
| <i>Cu/ZnSOD</i> | XM_044573539.1 | ctc cag tca tac tgg ttt cca tc<br>ttc ccg agt tca cgc ttc at    | 199               |
| <i>PX</i>       | XM_044466229.1 | tct ctt tca caa gcc acc aag<br>acg aag cag tcg tgg aag tg       | 261               |
| <i>GPX</i>      | XM_044519104.1 | gca aag tat ccc cgt cgtc ga<br>gta cct cga caa aag cac cc       | 184               |
| <i>CAT</i>      | NM_001405704.1 | cgc att gtc gtc gta cgt cat tc<br>ctc aga cat agc gac gct cc    | 217               |
| <i>GST</i>      | AY377972.1     | cag gca gtc aat cct cgg ac<br>agc ttt cat ttt gat atc ttt ggg c | 174               |
